# Supplementary material for: Methylene-bridged bimetallic bis(imino)pyridine-cobaltous chlorides as precatalysts for vinyl-terminated polyethylene waxes
Source: Royal Society of Chemistry journal article supplement (doi:10.1039/c8dt00907d), 2018-01-01
Supplement: c8dt00907d1.pdf [file c8dt00907d1.pdf]

## Supporting Information

### Methylene-bridged Bimetallic Bis(imino)pyridine-Cobaltous Chlorides as Precatalysts for Vinyl-terminated Polyethylene Waxes

Qiang Chen,<sup>a,b</sup> Wenjuan Zhang,<sup>\*,a,c</sup> Gregory A. Solan,<sup>\*,a,d</sup> Tongling Liang,<sup>a</sup> Wen-Hua Sun<sup>\*,a,b</sup>

<sup>a</sup>Key Laboratory of Engineering Plastics and Beijing National Laboratory for Molecular Sciences, Institute of Chemistry, Chinese Academy of Sciences, Beijing 100190, China. E-mail: whsun@iccas.ac.cn.

<sup>b</sup> CAS Research/Education Center for Excellence in Molecular Sciences, University of Chinese Academy of Sciences, Beijing 100049, China

<sup>c</sup> School of Materials Science and Engineering, Beijing Institute of Fashion Technology, Beijing 100029, China

<sup>d</sup> Department of Chemistry, University of Leicester, University Road, Leicester LE1 7RH, UK. E-mail: gas8@le.ac.uk

#### Contents

1. **Figure S1.** <sup>1</sup>H NMR spectrum of the polyethylene obtained using **Co1**/MAO (run 2, Table 2) in C<sub>2</sub>D<sub>2</sub>Cl<sub>4</sub> at 100 °C.
2. **Figure S2.** <sup>1</sup>H NMR spectrum of the polyethylene obtained using **Co1**/MMAO (run 2, Table 3) C<sub>2</sub>D<sub>2</sub>Cl<sub>4</sub> at 100 °C
3. **Figure S3.** <sup>1</sup>H NMR spectrum of the polyethylene obtained using **Co1**/MMAO (run 7, Table 3) in 1,2-dichlorobenzene-d<sub>4</sub> (100 °C).

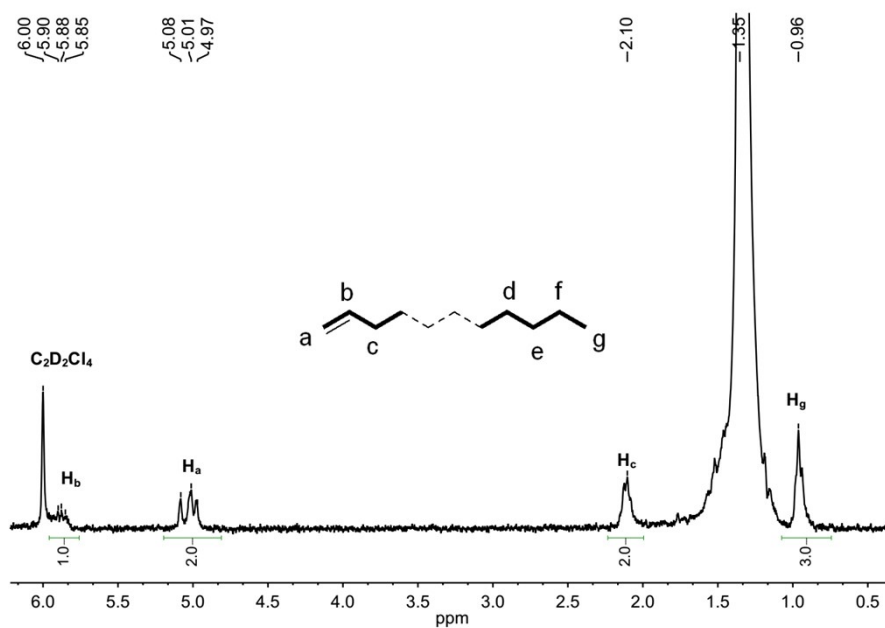

**Figure S1.** <sup>1</sup>H NMR spectrum (C<sub>2</sub>D<sub>2</sub>Cl<sub>2</sub>, 300MHz) of the polyethylene obtained using Co1/MAO (run 2, Table 2) at 100 °C.

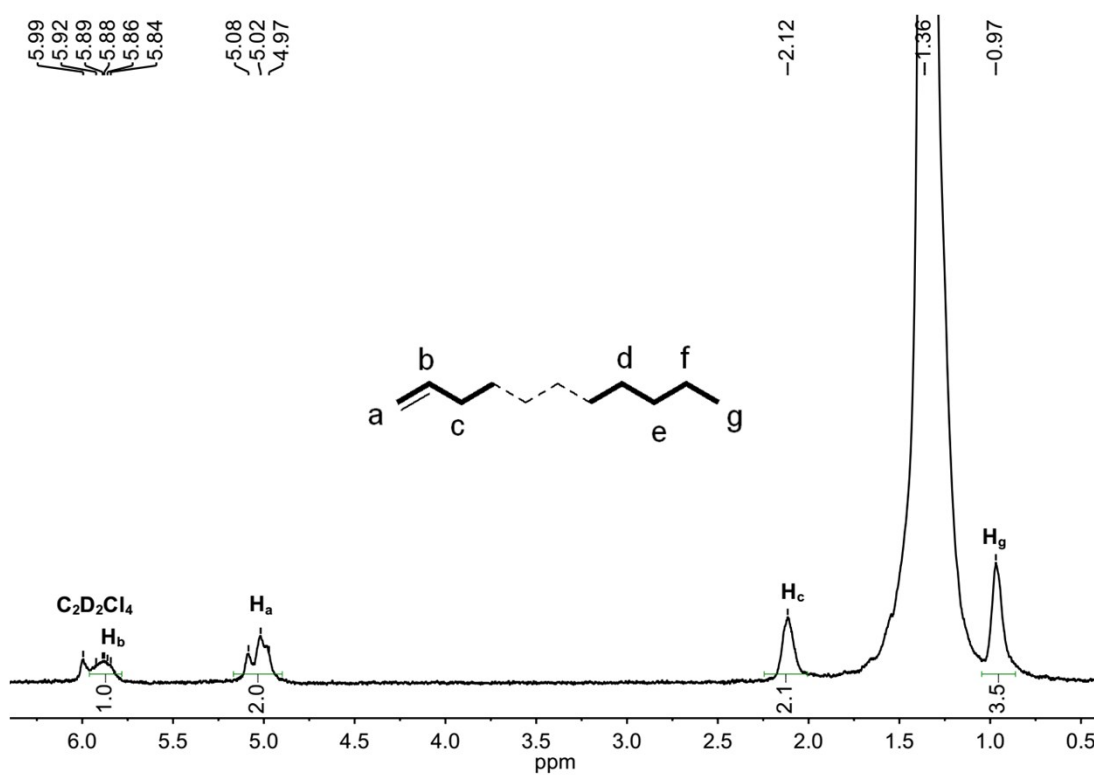

**Figure S2.** <sup>1</sup>H NMR spectrum (C<sub>2</sub>D<sub>2</sub>Cl<sub>2</sub>, 300MHz) of the polyethylene obtained using Co1/MMAO (run 2, Table 3) at 100 °C.

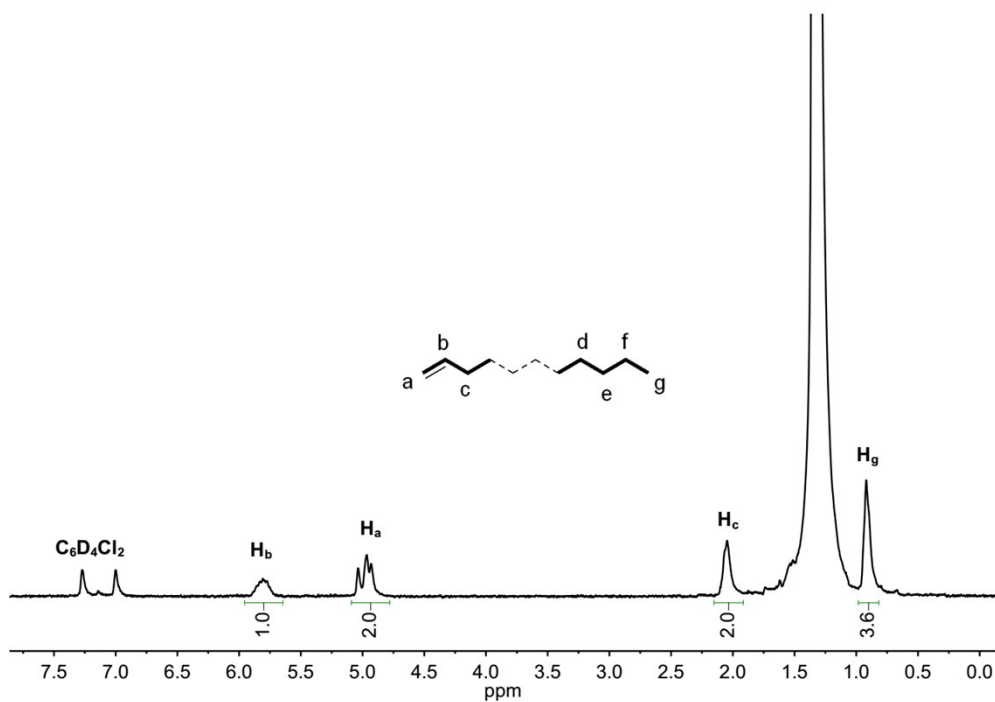

**Figure S3**  $^1\text{H}$  NMR spectrum of the polyethylene obtained using **Co1**/MMAO (run 7, Table 3) in 1,2-dichlorobenzene- $\text{d}_4$  (100 °C) (300MHz)
